# Supplementary figures and images for: Solvent effects on the intramolecular charge transfer excited state of 3CzClIPN: a broadband transient absorption study
Source: Royal Society of Chemistry journal article supplement (doi:10.1039/d3cp04975b), 2023-12-04

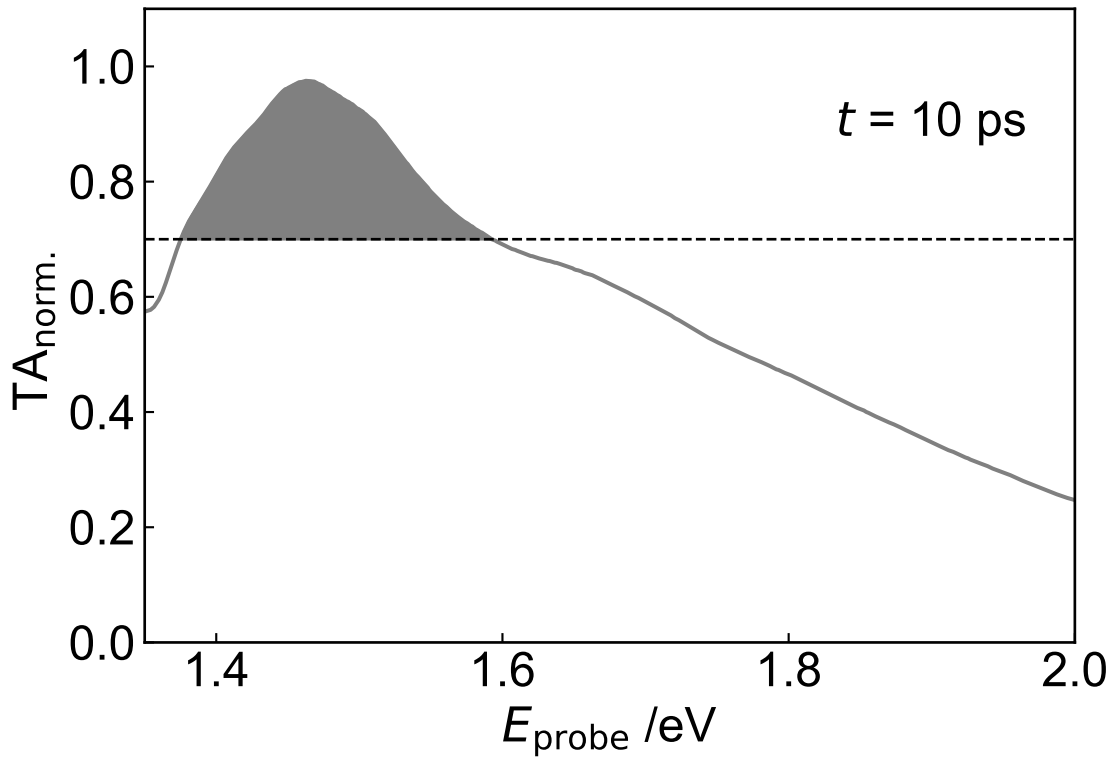

Supplement: d3cp04975b2.zip [file d3cp04975b2.zip]

(a)

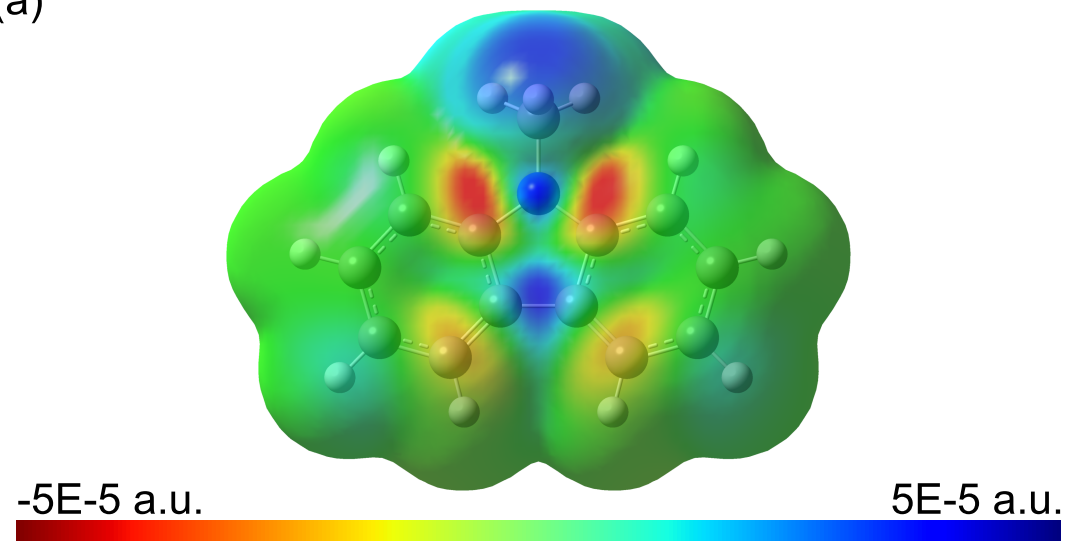

(b)

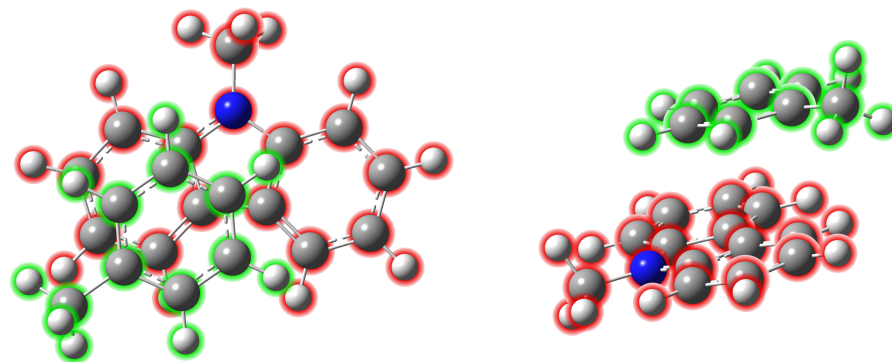

(c)

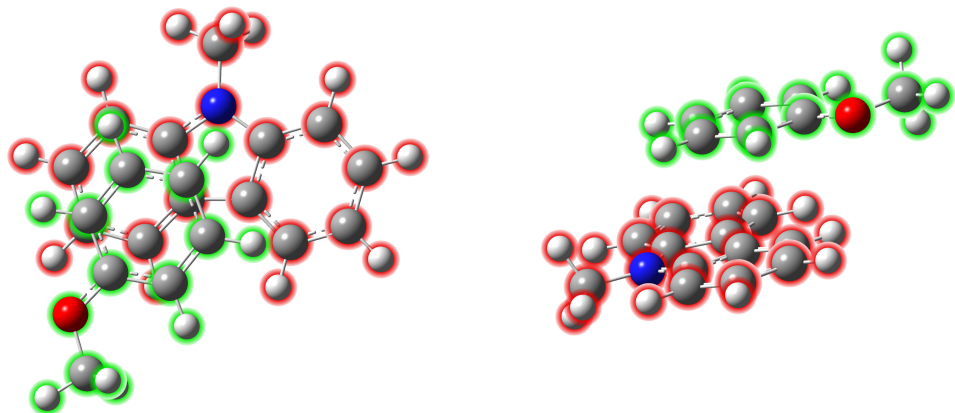

(d)

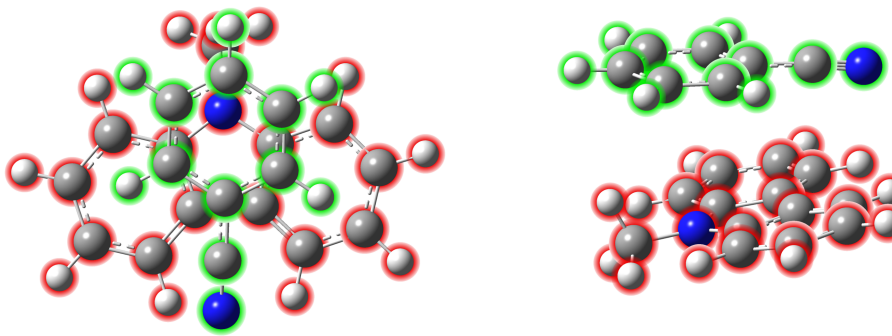

Supplement: d3cp04975b2.zip [file d3cp04975b2.zip]

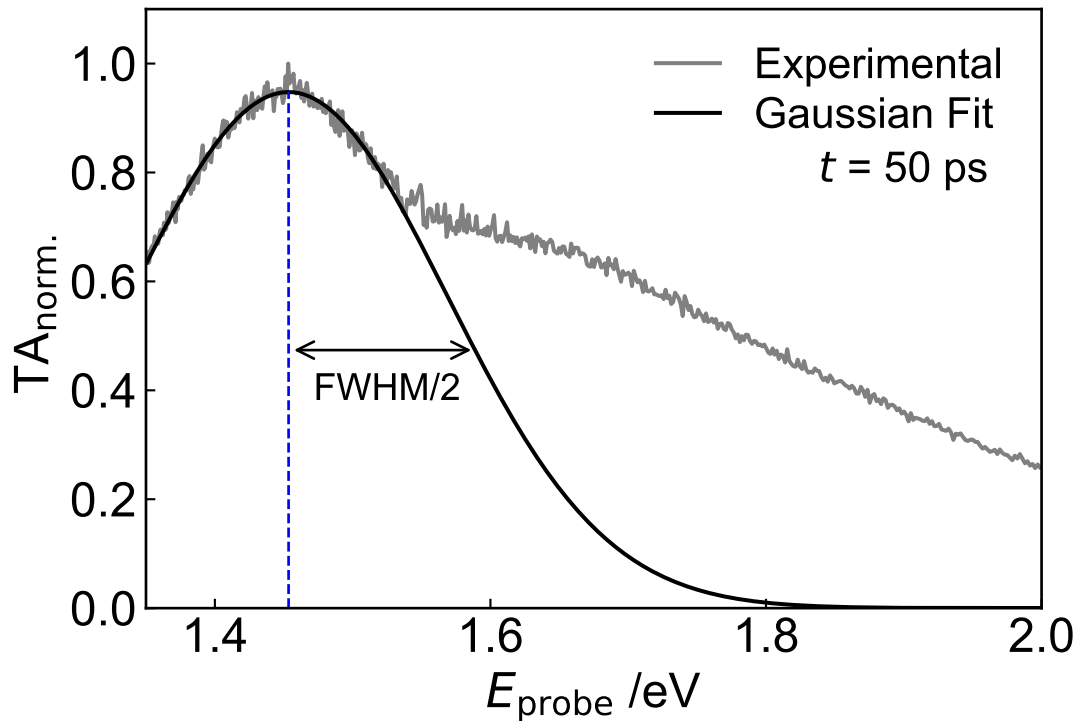

Supplement: d3cp04975b2.zip [file d3cp04975b2.zip]

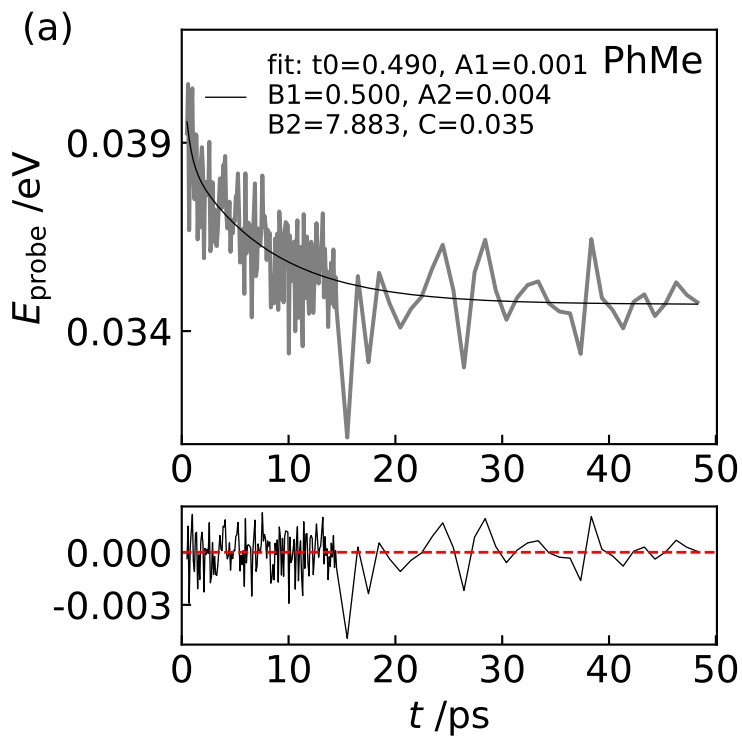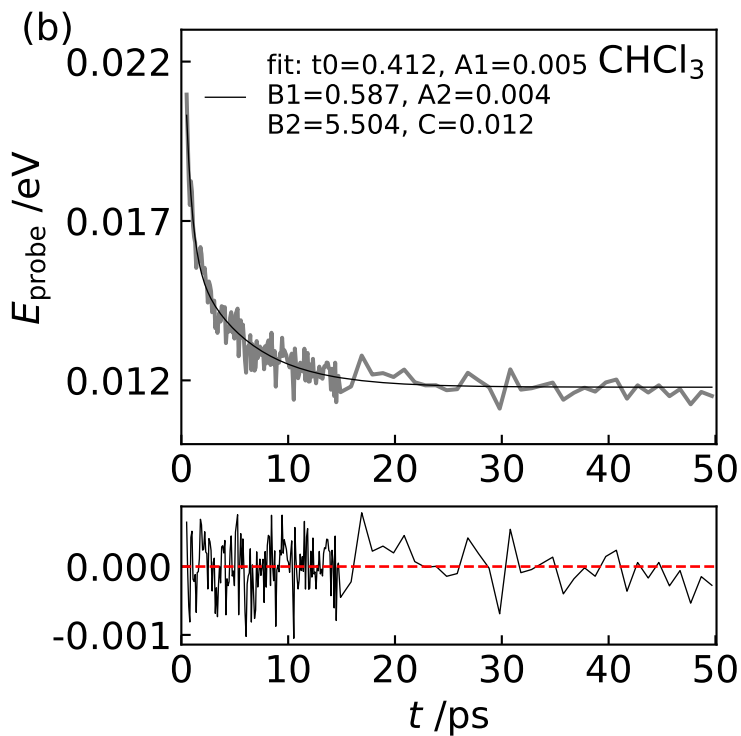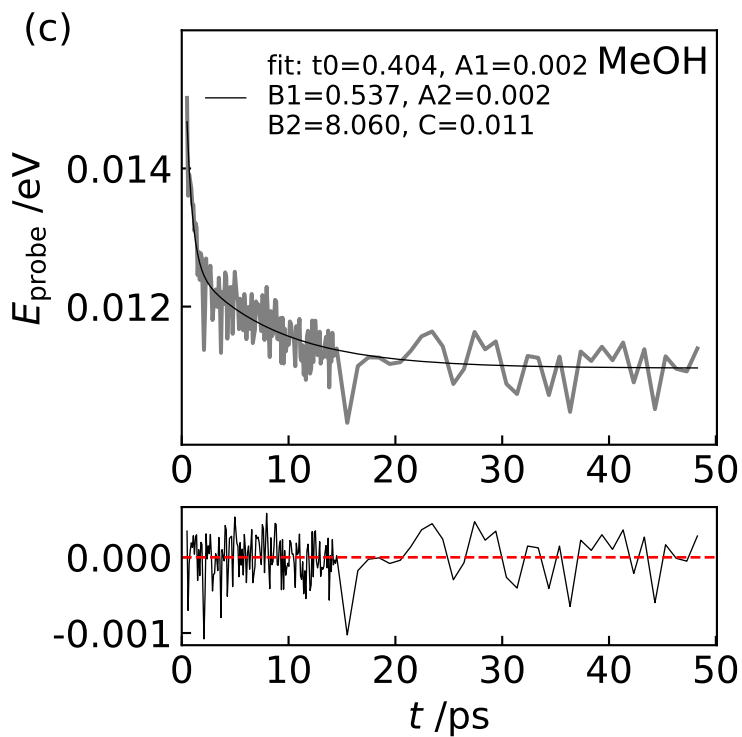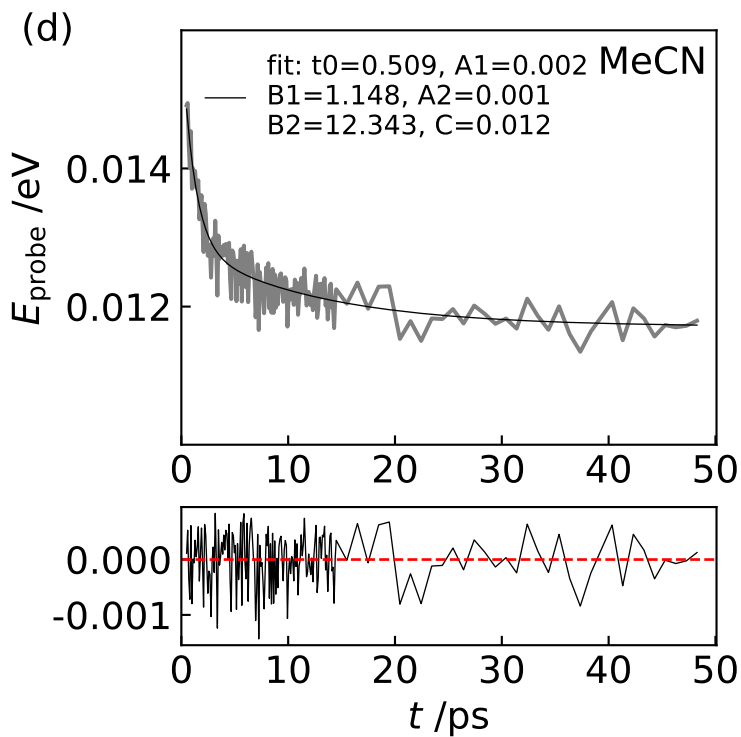

Supplement: d3cp04975b2.zip [file d3cp04975b2.zip]

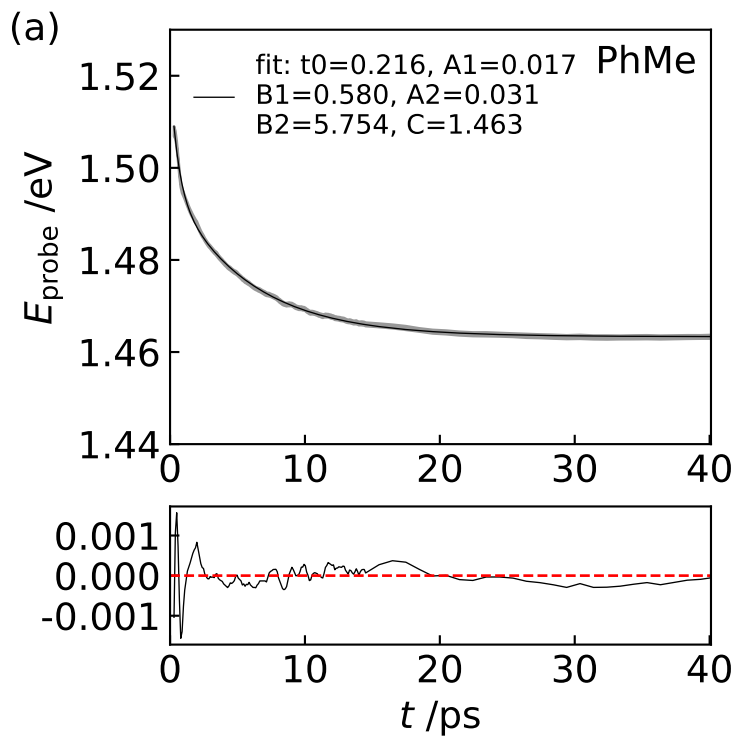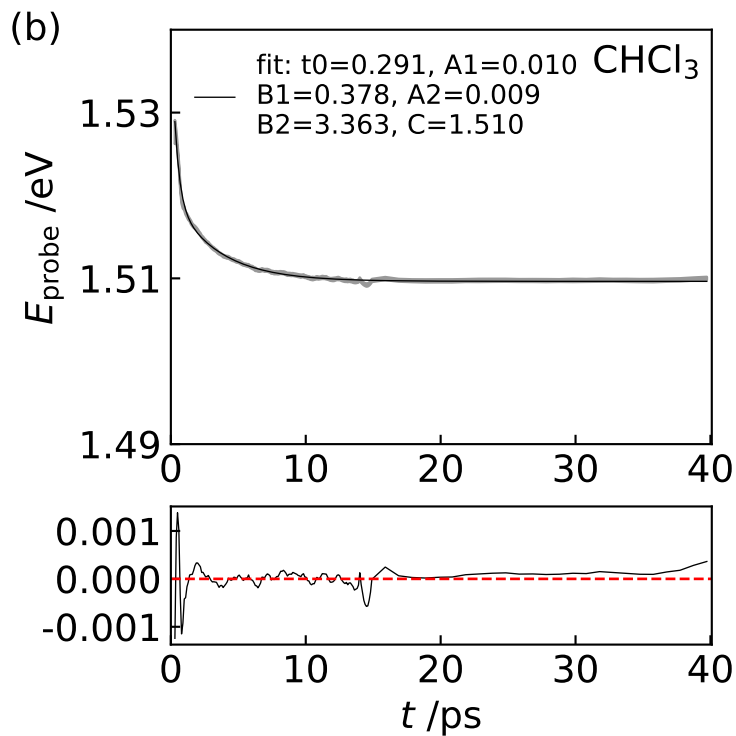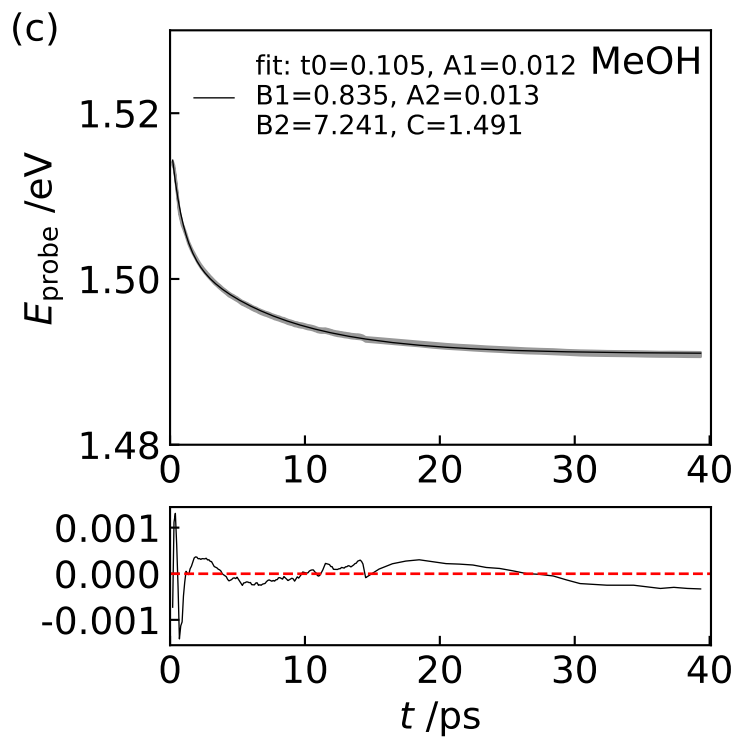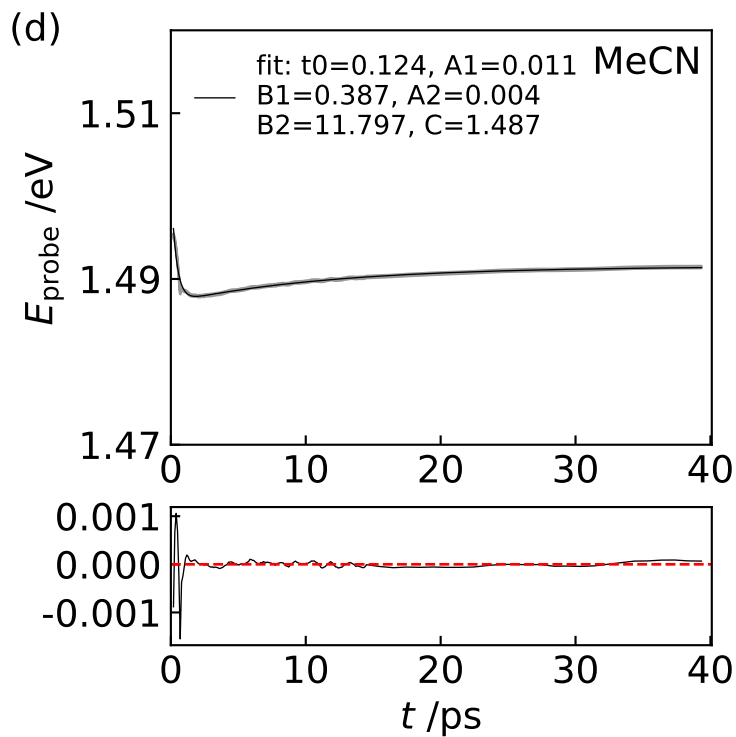

Supplement: d3cp04975b2.zip [file d3cp04975b2.zip]

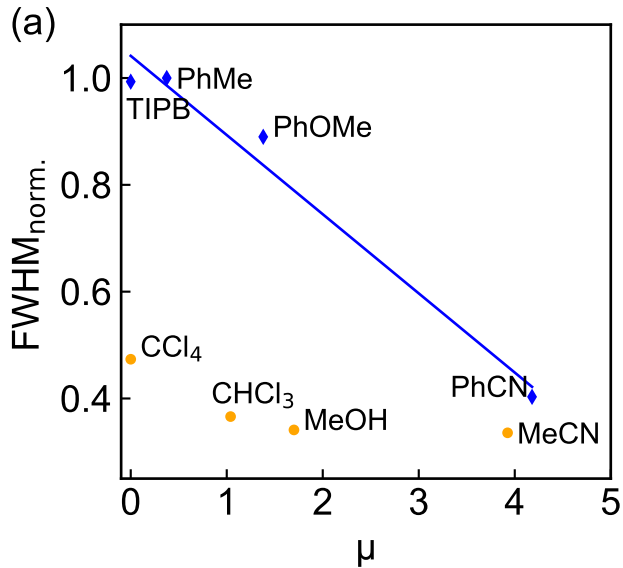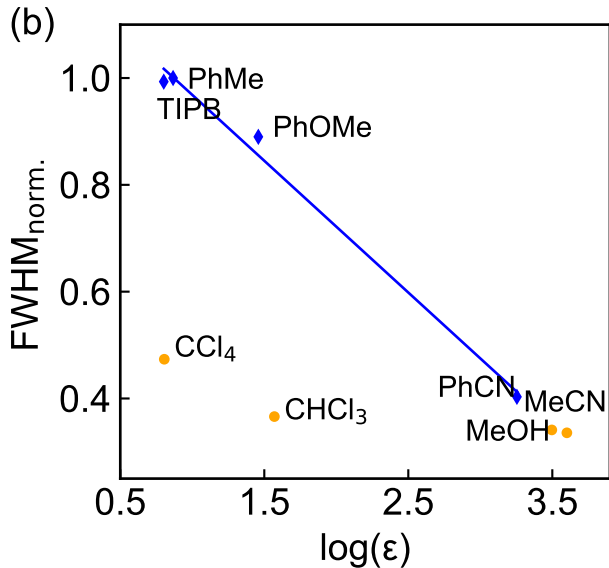

Supplement: d3cp04975b2.zip [file d3cp04975b2.zip]

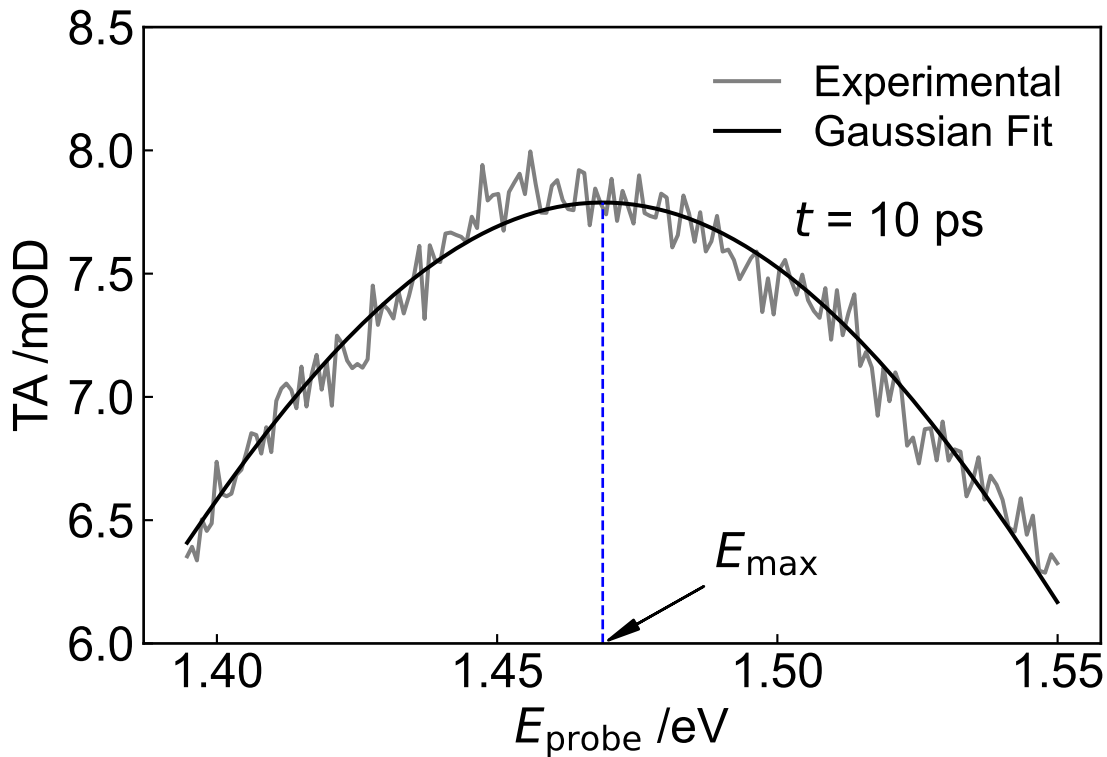

Supplement: d3cp04975b2.zip [file d3cp04975b2.zip]
